# Supplementary material
Source: MDPI journal article supplement (https://www.mdpi.com/2073-4441/13/23/3402)
Supplement: s1 [file s1]

**Table S1.** List of PAHs analyzed and primers used for ARGs quantification

| PAHs | Naphthalene (Naph), acenaphthene (Acen), fluorene (Fluo),<br>phenanthrene(Phen), anthracene (Antr), fluoranthene (Flu), pyrene (Pyr),<br>benz(a)anthracene (BaA), chrysene (Chry), benzo(b)fluoranthene(BbF),<br>benzo(k)fluoranthene (BkF), benzo(a)pyrene (BaP), dibenz(a,h)anthracene<br>(DBaA), benzo(ghi)perylene (BgP) and indeno(1,2,3-cd)pyrene (InP) |                          |
|------|---------------------------------------------------------------------------------------------------------------------------------------------------------------------------------------------------------------------------------------------------------------------------------------------------------------------------------------------------------------|--------------------------|
|      | Primer name                                                                                                                                                                                                                                                                                                                                                   | Target gene              |
|      |                                                                                                                                                                                                                                                                                                                                                               | Primer sequence (5'->3') |
|      | Sul1 fw                                                                                                                                                                                                                                                                                                                                                       | CGCACCGGAAACATCGCTGCAC   |
|      | Sul1 rv                                                                                                                                                                                                                                                                                                                                                       | TGAAGTTCCGCCGCAAGGCTCG   |
|      | Sul2 fw                                                                                                                                                                                                                                                                                                                                                       | GCGCTCAAGGCAGATGGCATT    |
|      | Sul2 rv                                                                                                                                                                                                                                                                                                                                                       | GCGTTTGATAACCGGCACCCGT   |
|      | IntI1 fw                                                                                                                                                                                                                                                                                                                                                      | TCGTGCGTCGCCATACA        |
|      | IntI1 rv                                                                                                                                                                                                                                                                                                                                                      | GCTTGTTCTACGGCCGTTTGA    |
|      | 16S fw                                                                                                                                                                                                                                                                                                                                                        | CGGTGAATACGTTTCYCGG      |
|      | 16S rv                                                                                                                                                                                                                                                                                                                                                        | TACCTTGTTACGACTT         |
|      | qnrS fw                                                                                                                                                                                                                                                                                                                                                       | GACGTGCTAACTTGCGTGAT     |
|      | qnrS rv                                                                                                                                                                                                                                                                                                                                                       | TGGCATTGTTGGAAACTT       |
|      | qepA fw                                                                                                                                                                                                                                                                                                                                                       | GCAGGTCCAGCAGCGGGTAG     |
|      | qepA rv                                                                                                                                                                                                                                                                                                                                                       | CTTCCTGCCCCGAGTATCGTG    |
